# Supplementary material
Source: publisher site journal article supplement (https://www.dovepress.com/article/supplementary_file/533474/Supplementary%20files.docx)
Supplement: Supplementary file 1 [file Supplementary%20files.docx]

**Supplementary Figures**


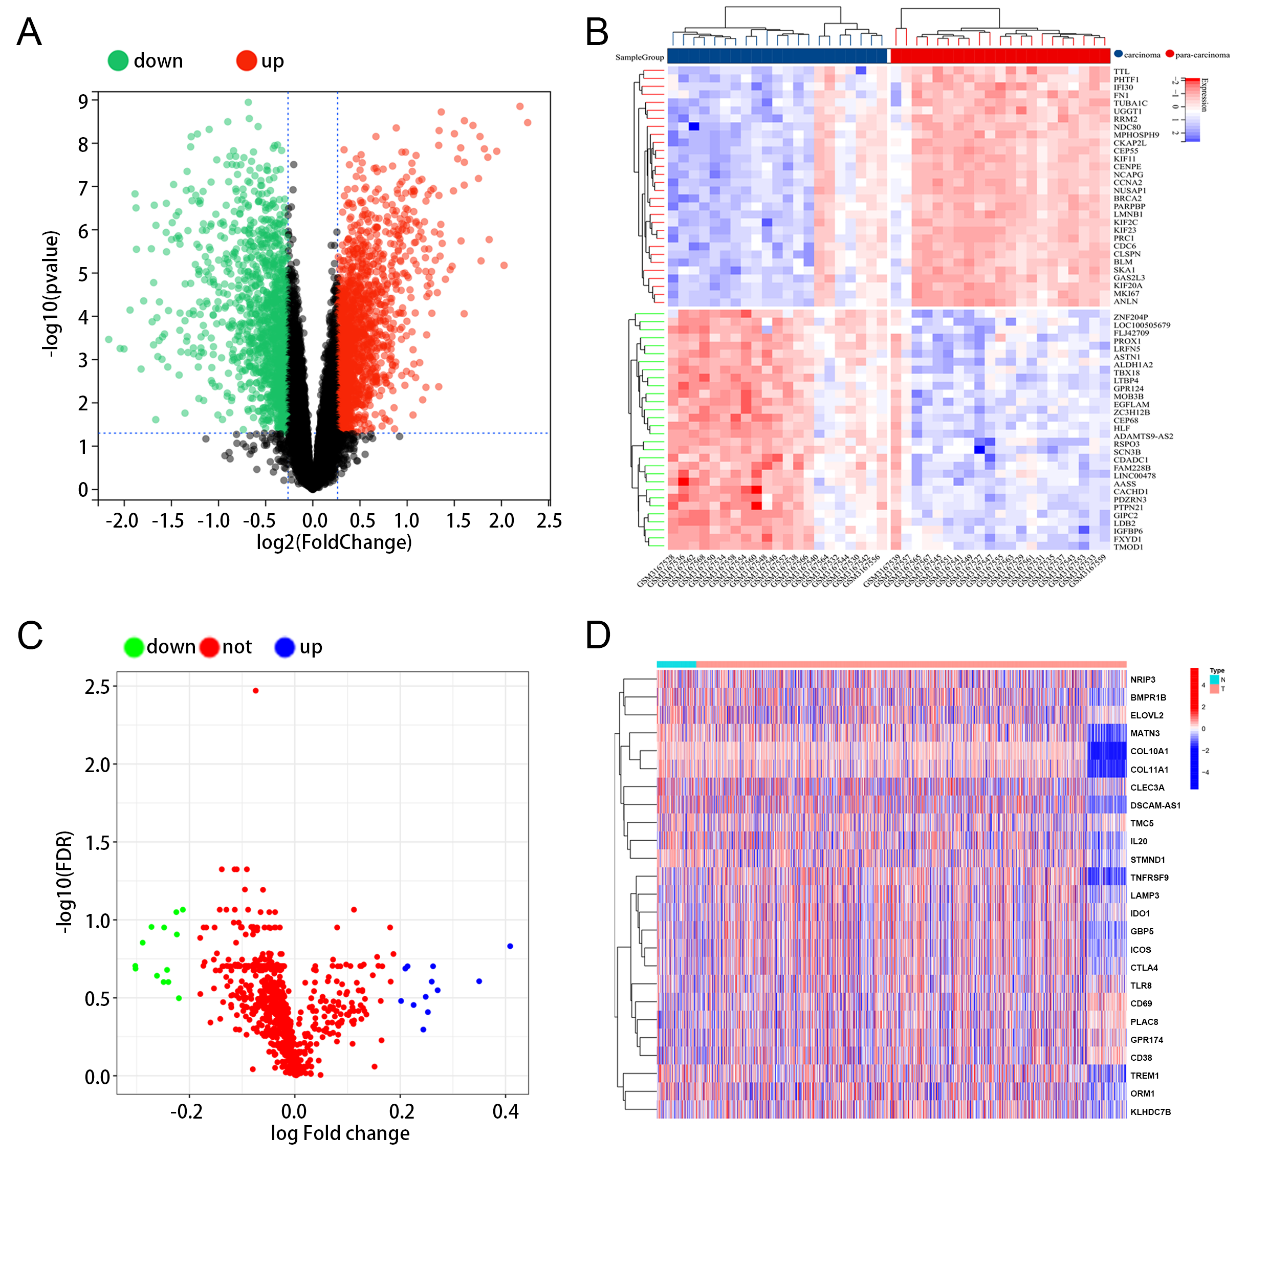


**Figure S1 Identification of differentially expressed genes.**

**A-B.** Volcano plot and heatmap of differentially expressed genes (DEGs) in GSE115144. **C-D.** Differential expression analysis of DEGs in GSE115144 based on expression profiles in TCGA-BC.


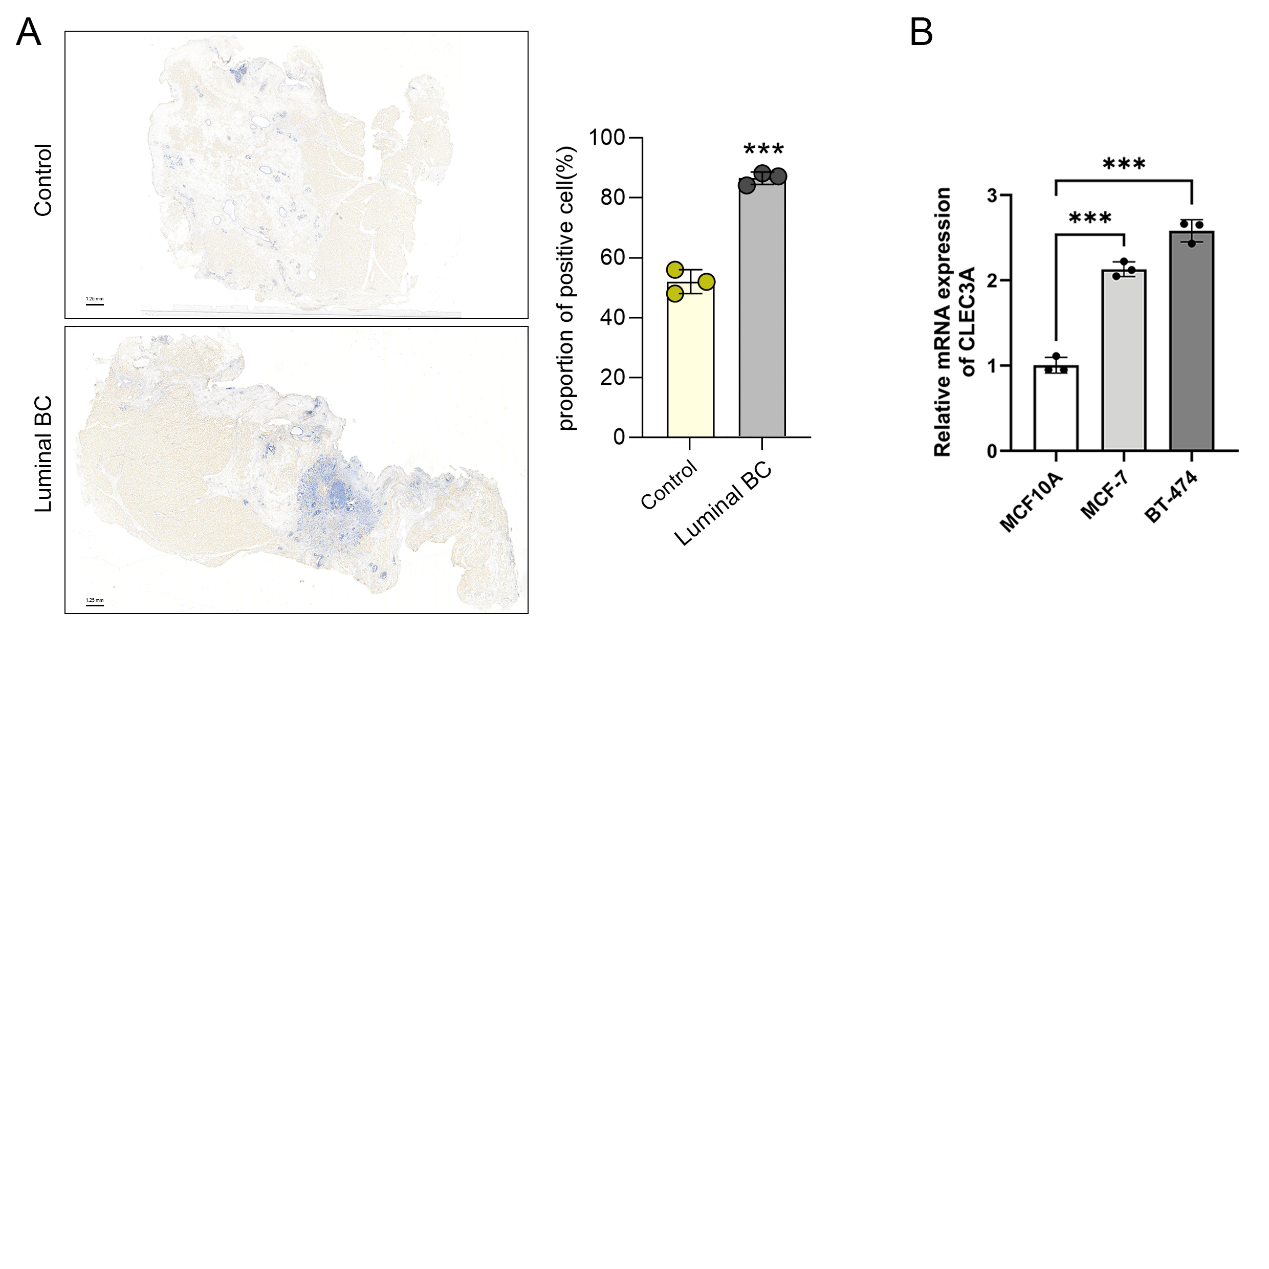


**Figure S2 Expression levels of CLEC3A.**

**A.** Positive expression of CLEC3A in normal and luminal BC tissues. **B.** Relative mRNA expression of CLEC3A in normal and luminal BC cells. ***p<0.001.

**Supplementary Table**

**Table S1** Primer sequences used in the RT-qPCR

| Genes | Sequences |
| --- | --- |
| Human-CLEC3A-F | CGTCGAGTGAGAGACAAGGA |
| Human-CLEC3A-R | TTAGTGCCTCGGAGACAGAC |
| Human-CCND1-F | GTCGCTGGAGCCCGTGAAA |
| Human-CCND1-R | CGGATGGAGTTGTCGGTGTA |
| Human-BCL2-F | GAGTTCGGTGGGGTCATG |
| Human-BCL2-R | GGAGAAATCAAACAGAGGC |
| Human-CDKN1A-F | GGGATGAGTTGGGAGGAGG |
| Human-CDKN1A-R | TGAGCGAGGCACAAGGGTA |
| Human-E2F1-F | AAGAACCGCTGTTGTCCCG |
| Human-E2F1-R | GAGGCCGAAGTGGTAGTCG |
| Human-MYC-F | CAGCGAGGATATCTGGAAG |
| Human-MYC-R | GAAGGGAGAAGGGTGTGAC |
| Human-PCNA-F | TCAAGAAGGTGTTGGAGGCA |
| Human-PCNA-R | TCGCAGCGGTAGGTGTCG |
| Human-PD-L1-F | ATCTTATTATGCCTTGGTG |
| Human-PD-L1-R | TTTGCTTCTTTGAGTTTGT |
| Human-CXCL10-F | TTTGCTGCCTTATCTTTC |
| Human-CXCL10-R | TCCTTGCTAACTGCTTTC |
| Human-CCL2-F | TAGCAGCCACCTTCATTC |
| Human-CCL2-R | CTTGGGGTCAGCACAGAT |
| Human-IL2-F | ATTACAAGAATCCCAAACTC |
| Human-IL2-R | ATTGCTGATTAAGTCCCT |
| Human-IFNG-F | CTTTTCTTAGGCATTTTGA |
| Human-IFNG-R | ATGTCTTCCTTGATGGTCT |
| Human-STAT1-F | GCTTCTTGGTCCTAACGC |
| Human-STAT1-R | TCTCGCTCCTTGCTGATG |
| Human-GAPDH-F | ACAACAGCCTCAAGATCATCAGC |
| Human-GAPDH-R | GCCATCACGCCACAGTTTCC |
